# Supplementary material for: Fabrication of Enzyme-Free and Rapid Electrochemical Detection of Glucose Sensor Based on ZnO Rod and Ru Doped Carbon Nitride Modified Gold Transducer
Source: MDPI journal article supplement (doi:10.3390/nano12101778), 2022-05-23
Supplement: s1 [file s1]

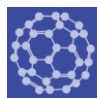

## Supplementary Materials

# Fabrication of Enzyme-Free and Rapid Electrochemical Detection of Glucose Sensor Based on ZnO Rod and Ru Doped Carbon Nitride Modified Gold Transducer

Habibulla Imran <sup>1,2</sup>, Asrar Alam <sup>1</sup>, Venkataraman Dharuman <sup>2,\*</sup> and Sooman Lim <sup>1,\*</sup>

<sup>1</sup> Department of Flexible and Printable Electronics, LANL-JBNU Engineering Institute, Jeonbuk National University, Jeonju 54896, Korea; imranh091@gmail.com (H.I.); asrarlm0@gmail.com (A.A.)

<sup>2</sup> Molecular Electronics Laboratory, Department of Bioelectronics and Biosensors, Science Campus, Alagappa University, Karaikudi 630004, India

\* Correspondence: dharumanudhay@yahoo.com (V.D.); smlim@jbnu.ac.kr (S.L.)

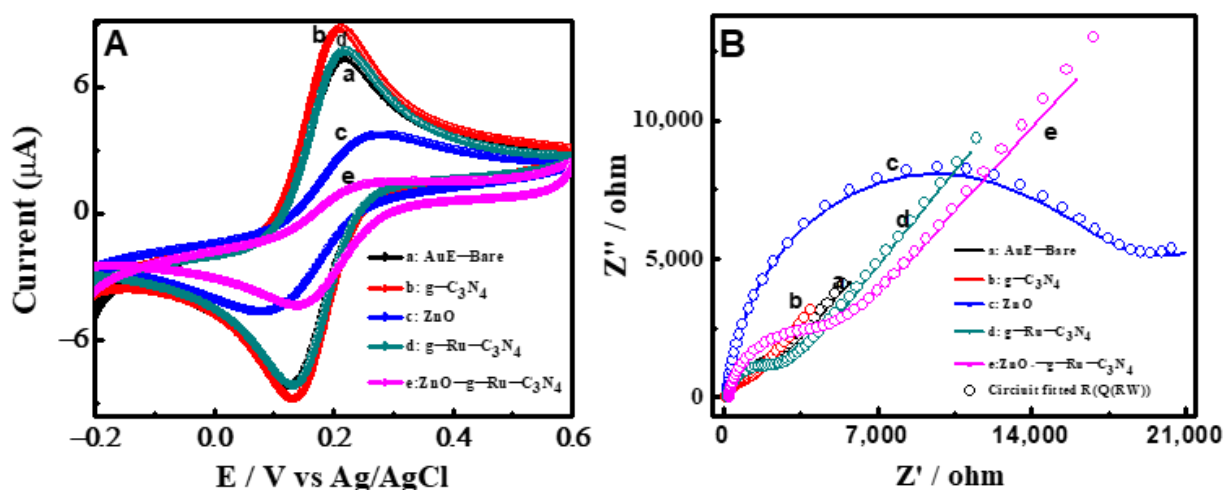

**Figure S1.** CV (A) and EIS (B) behaviors of AuE (curve a), AuE-g-C<sub>3</sub>N<sub>4</sub>(curve b), AuE-ZnO (Curve c), AuE-g-Ru-C<sub>3</sub>N<sub>4</sub> (curve d) and AuE-ZnO-g-Ru-C<sub>3</sub>N<sub>4</sub>. Measurements are made in presence of [Fe(CN)<sub>6</sub>]<sup>3-/4-</sup> in PBS (pH 7.4).Star line: [R(Q(RW))] circuit fit data.

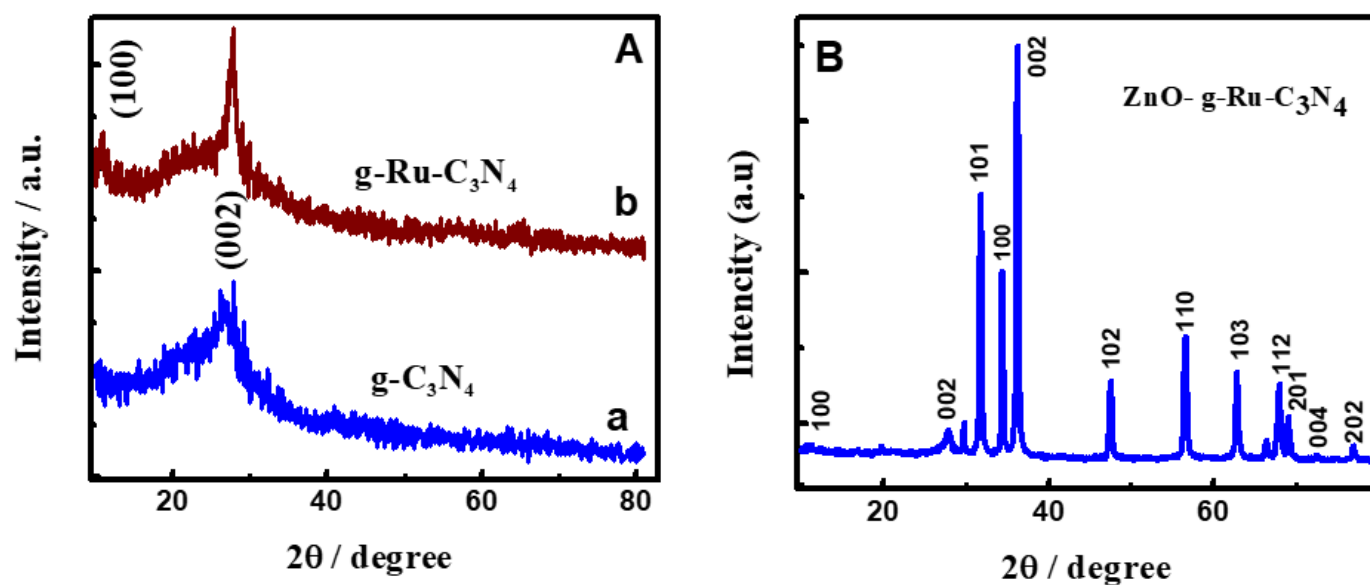

Figure S2. XRD pattern (A) of g-C<sub>3</sub>N<sub>4</sub> (curve a), g-Ru-C<sub>3</sub>N<sub>4</sub> (curve b), and ZnO-g-Ru-C<sub>3</sub>N<sub>4</sub> (B).

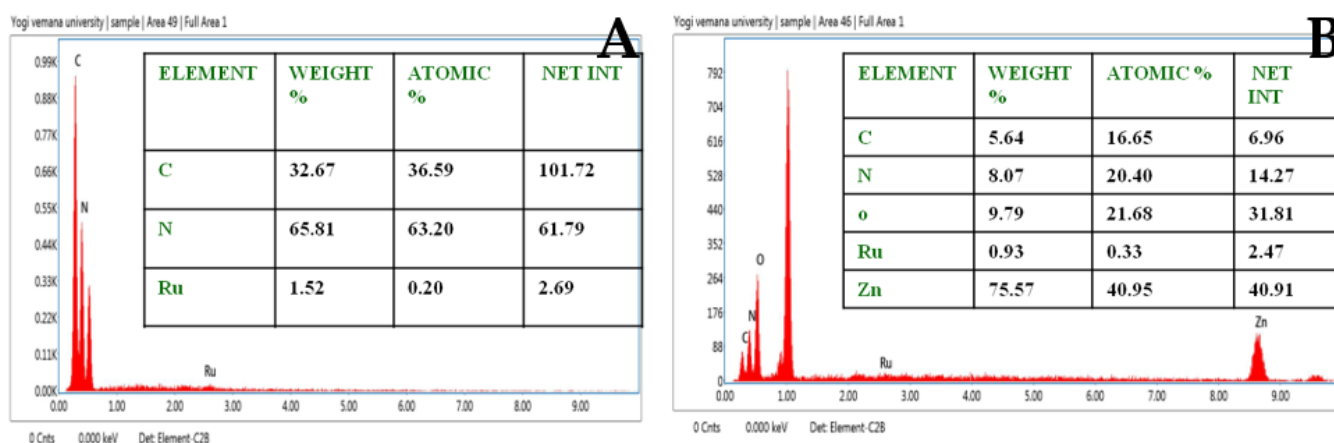

Figure S3. Energy dispersive X-ray (EDX) analyses of Ru-doped g-C<sub>3</sub>N<sub>4</sub> (A) and ZnO-g-Ru-C<sub>3</sub>N<sub>4</sub> (B).

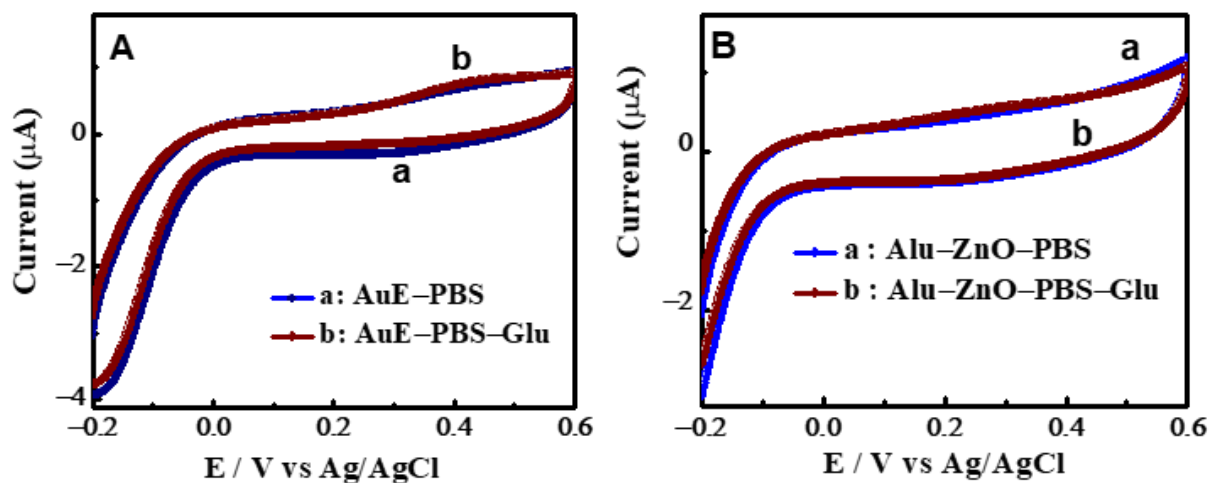

Figure S4. CV behavior of unmodified gold electrode (A) and ZnO (B) modified electrode in the absences (curve a) and presences (curve b) of 1 mM glucose in PBS at a scan rate of  $50 \text{ mV s}^{-1}$ .

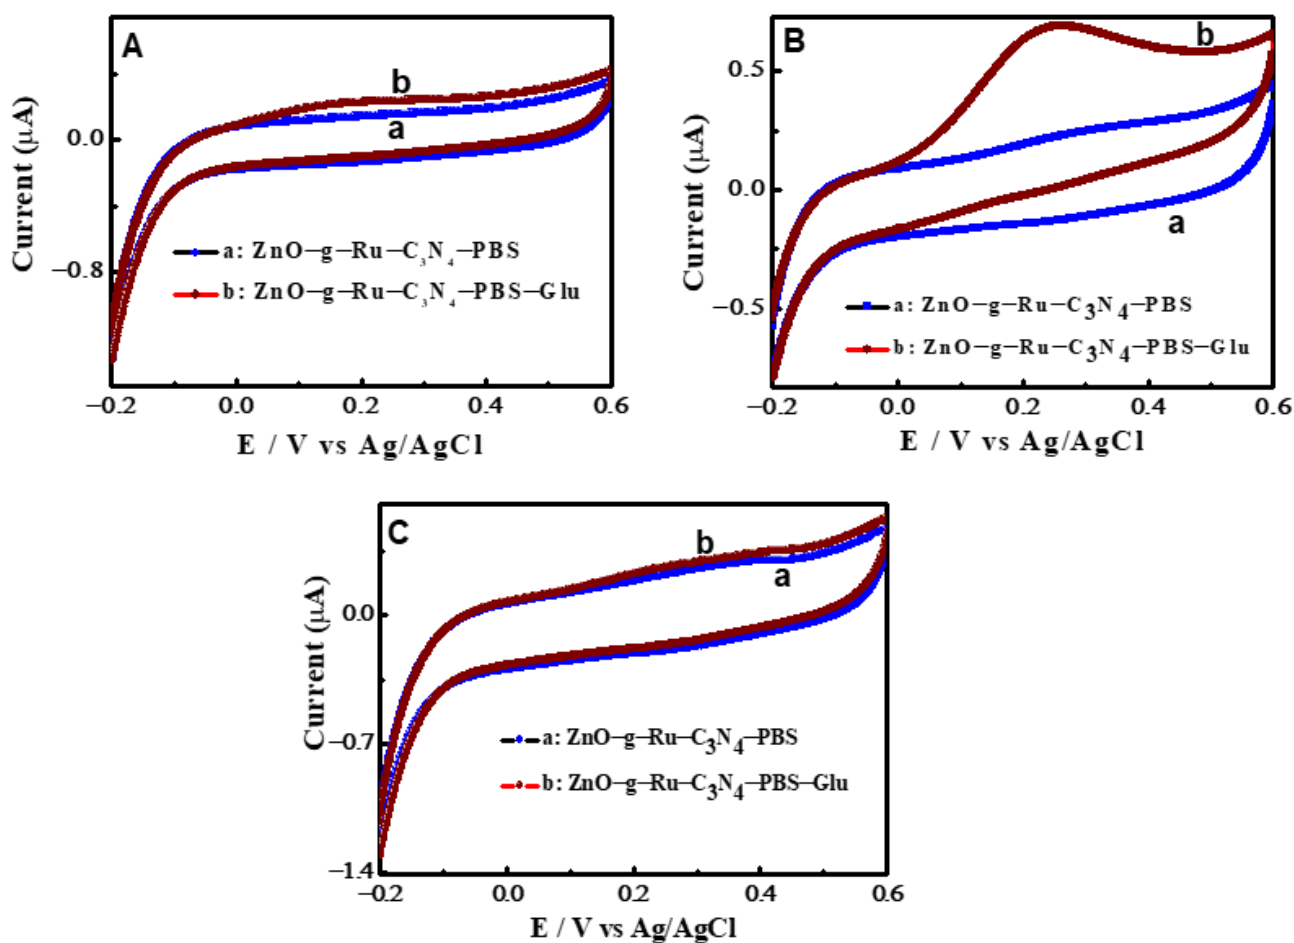

Figure S5. Effect of different ratio of g-Ru-C<sub>3</sub>N<sub>4</sub> and ZnO mixture (ratio 1:1 (A), 1:2 (B) and 2:1 (C)) used for AuE modification and used for the glucose sensing. Measured in PBS in the absences (curve a) and presences (curve b) of 1 mM glucose at a scan rate  $50 \text{ mV s}^{-1}$ .

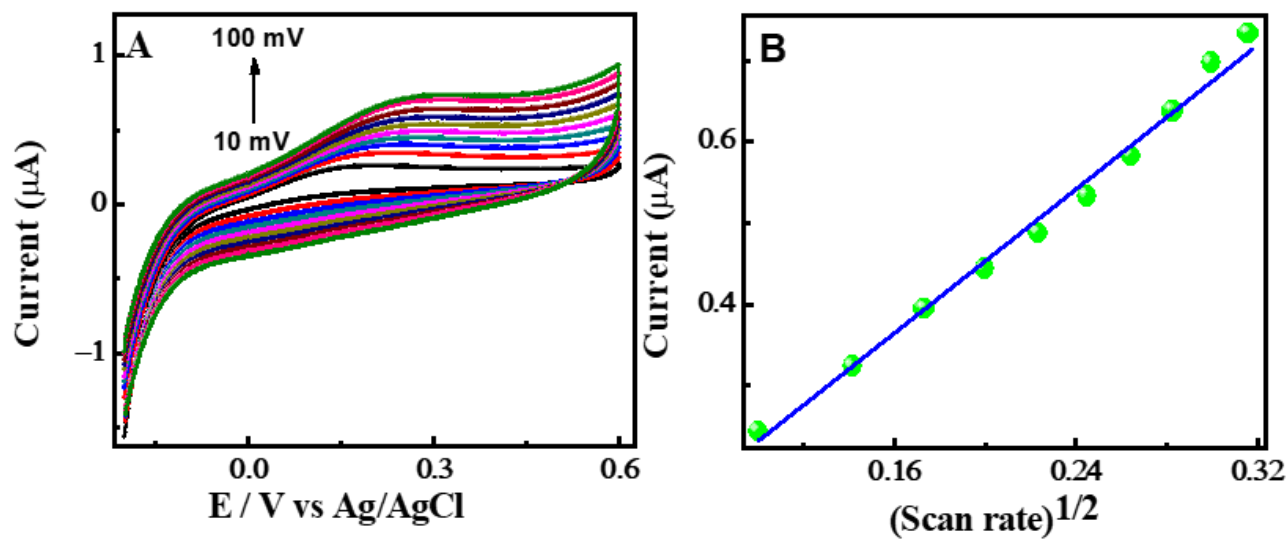

**Figure S6.** (A) Effect of varying scan rate on the CV behavior of ZnO-g-Ru-C<sub>3</sub>N<sub>4</sub>. (B) Corresponding plots of (scan rate)<sup>1/2</sup> versus current.

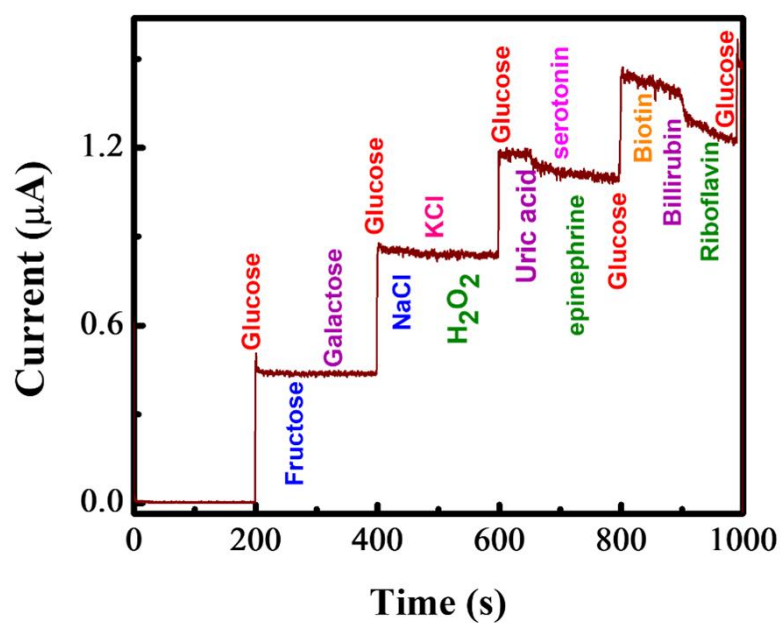

**Figure S7.** Selective sensing of glucose with the potential interferences are fructose, galactose, riboflavin, billurubin, biotin, NaCl, KCl, H<sub>2</sub>O<sub>2</sub>, uric acid, serotonin and epinephrine with the concentration of 0.1 mM in PBS.

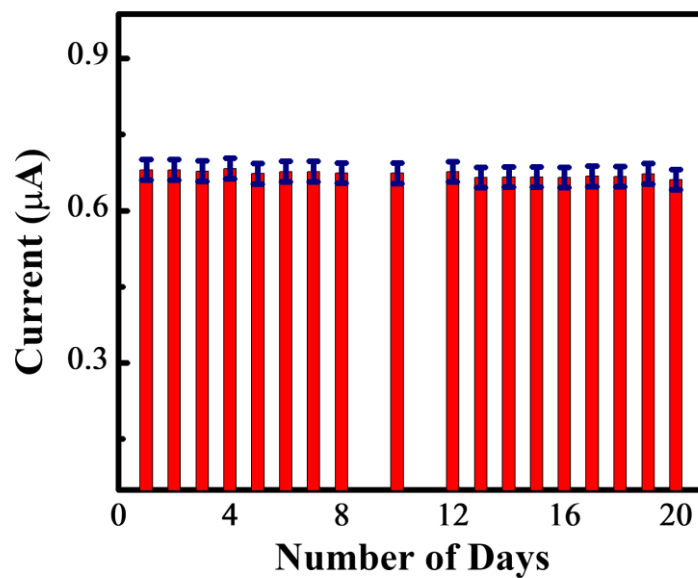

**Figure S8.** Study of stability of ZnO-g-Ru-C<sub>3</sub>N<sub>4</sub> modified electrode monitored voltammetrically in presence of 1 mM glucose in PBS. Anodic peak current is plotted against Number of days.

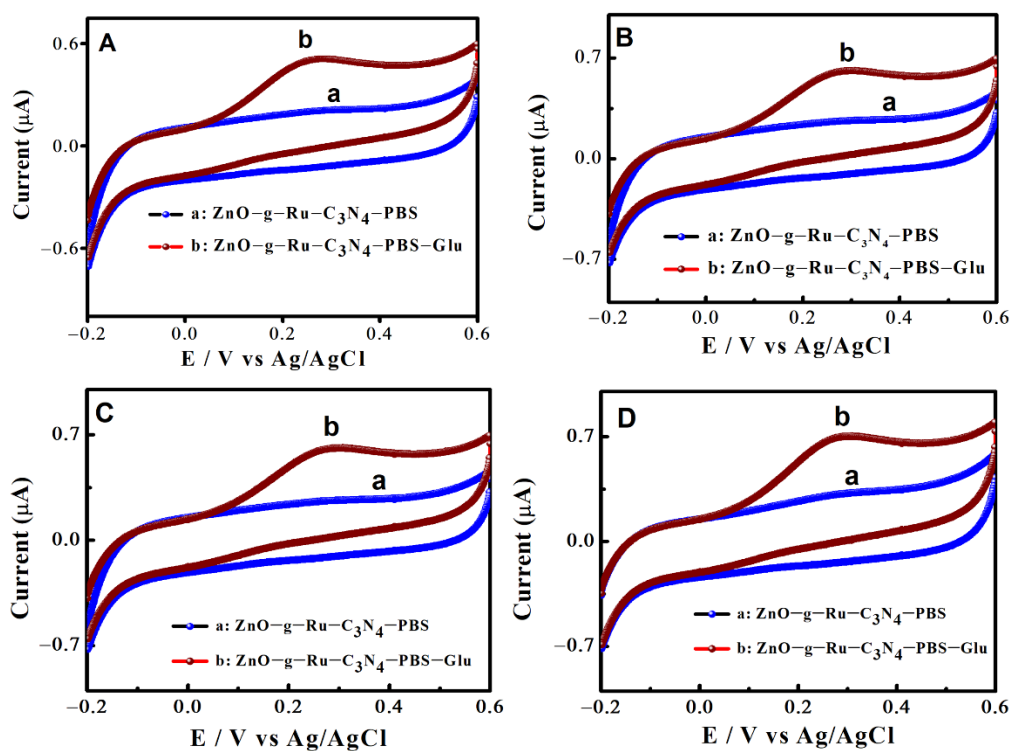

**Figure S9.** Reproducibility data obtained on using four different gold electrodes of similar activity for modifying with ZnO-g-Ru-C<sub>3</sub>N<sub>4</sub>. Measured in PBS in the absences (curve a) and presences (curve b) of 1 mM glucose at a scan rate of 50 mV s<sup>-1</sup>.

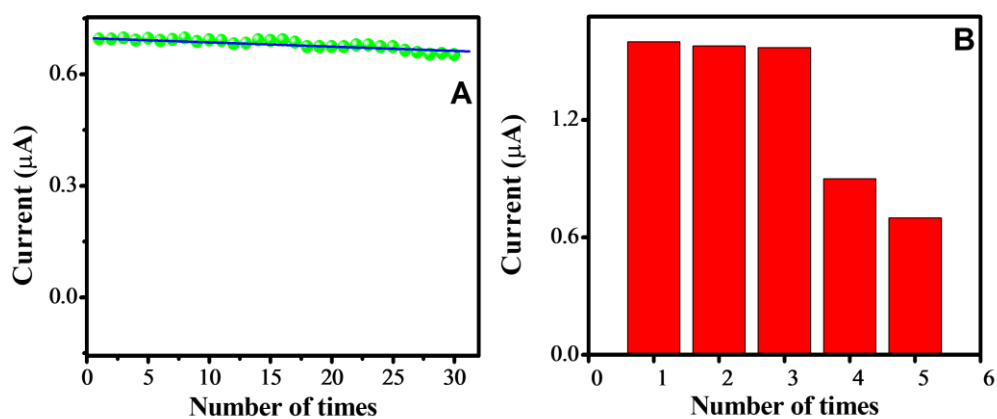

**Figure S10.** Reusable single electrode is measured in PBS (A) in the presences of 1 mM glucose at a scan rate of  $50 \text{ mV s}^{-1}$ . (B) Blood serum.

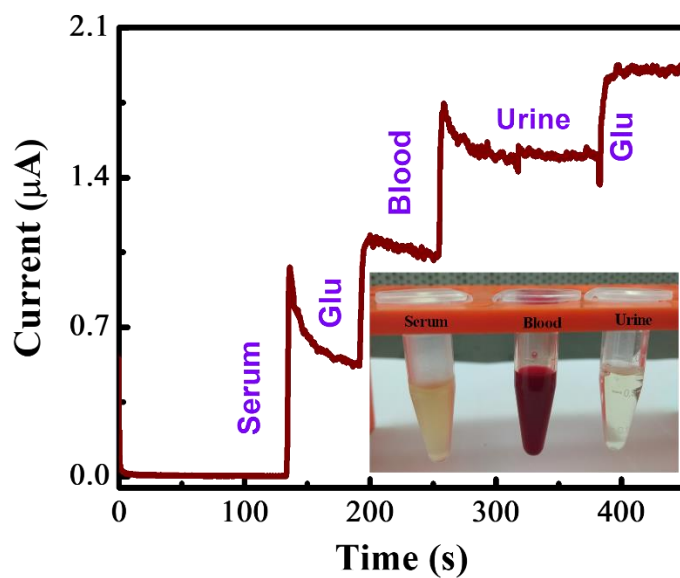

**Figure S11.** Developed sensor device practically tested in human blood, blood serum and urine samples.
